# Supplementary material
Source: Springer Nature journal article supplement (https://www.springermedizin.de/resource/supplementary/12916_2010_298_MOESM2_ESM.pdf/9599588)

## A) SBP all studies

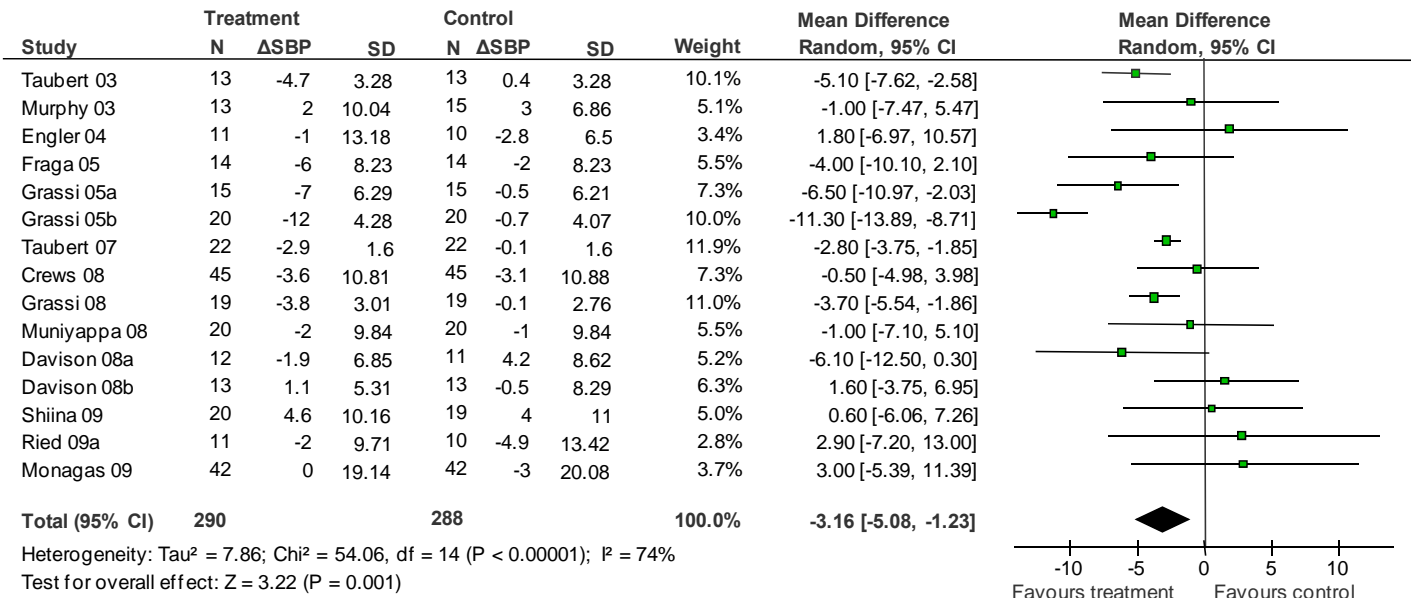

## B) DBP all studies

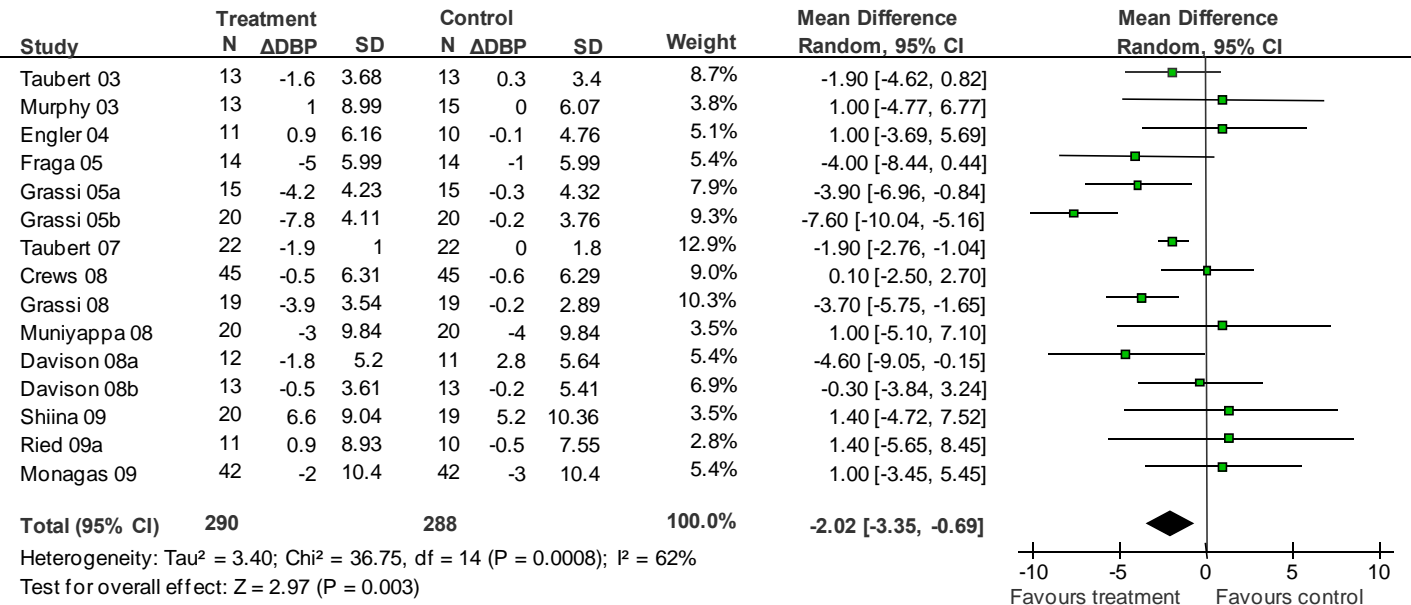

Supplement: MOESM2 [file 9599588]
